# Supplementary material for: Are Tumor Marker Tests Applied Appropriately in Clinical Practice? A Healthcare Claims Data Analysis
Source: MDPI journal article supplement (doi:10.3390/diagnostics13213379), 2023-11-03
Supplement: s1 [file s1]

## Supplementary Material

**Table S1.** Tumor marker (TM), indications for determination and cancer related diseases and interventions (CDI).

| TM         | Indications for TM determination according to medical guidelines                                                                                                                                                                                                                                                                                                                                                                                                                                                                                                                                                                                                                                                                                                                                                                 | Antineoplastic<br>(ATC <sup>a</sup> ) | Diagnoses<br>(ICD-10 <sup>b</sup> )           | Inpatient operation<br>(CHOP <sup>c</sup> )                | Outpatient operations and procedures<br>(TARMED <sup>d</sup> )                                                            |
|------------|----------------------------------------------------------------------------------------------------------------------------------------------------------------------------------------------------------------------------------------------------------------------------------------------------------------------------------------------------------------------------------------------------------------------------------------------------------------------------------------------------------------------------------------------------------------------------------------------------------------------------------------------------------------------------------------------------------------------------------------------------------------------------------------------------------------------------------|---------------------------------------|-----------------------------------------------|------------------------------------------------------------|---------------------------------------------------------------------------------------------------------------------------|
| All TM     |                                                                                                                                                                                                                                                                                                                                                                                                                                                                                                                                                                                                                                                                                                                                                                                                                                  | L01                                   |                                               |                                                            | 37.0210-0270 (histology), 39.4060 and 39.4080 (CT-thorax/abdomen), 32 (radio oncology), 00.1530 (>2 visits to oncologist) |
| CEA        | According to international guidelines, CEA should be determined before operating on <b>colorectal cancer</b> and afterwards every three to six months (depending on guideline) for two years and every six to 12 months for the following 3 years [10]. It can be used in ad-vanced colorectal cancer for therapy monitoring as well. It should not be used as a screening parameter [20]. In the rare cases of medullary thyroid cancer, CEA can be (in addition to Calcitonin) a “valuable diagnostic, prognostic and predictive marker” according to guidelines, since its serum concentration is related to the tumor cell mass [18,23,36]. However, it should not be used with diagnosis of every thyroid nodule [18]. Because of the latter, thyroid cancer in ICD-10 was not coded as appropriate for CEA de-termination. | L01                                   | C18, C19, C20 (colorectal cancer)             | 45.7, 45.8, 48.3511, 48.5, 48.6                            | 20.1540, 20.1550, 20.1570, 20.1580, 20.1590, 20.1600, 20.1610                                                             |
| NSE        | NSE should be determined at least once with diagnosis of a <b>neuroendocrine carcinoma</b> [6,22]. It should like other TM not be used for cancer screening. At least since the year 2000 it is not recommended for <b>lung cancer</b> diagnosis and follow-up in German speaking guidelines [37,38]. There is no routine indication according to current guidelines for other tumor entities like Merkel carcinoma, neuroblastoma or metastasized melanoma [39], but it is used in medical praxis for the previous indications.                                                                                                                                                                                                                                                                                                 | L01                                   | C34 (lung cancer)                             | for lung cancer: 32.2, 32.4, 32.5, 32.6                    | for lung cancer: 16.0620, 16.0630, 16.0640, 16.0650, 16.0660, 16.0670, 16.0690, 16.0700                                   |
| Calcitonin | For the diagnosis of <b>medullary thyroid cancer</b> (MTC), demonstration of calcitonin expression is mandatory [18,35]. Calcitonin is a prognostic and predictive marker in MTC. However, it is not recommended by guidelines to determine Calcitonin in every patient with thyroid nodules [35,36,40].                                                                                                                                                                                                                                                                                                                                                                                                                                                                                                                         | L01                                   | C73 (thyroid cancer)                          | 06.4, 06.5, 06.2, 06.3                                     | 14.0170, 14.0180, 14.0190, 14.0200, 14.0210, 14.0220                                                                      |
| CA 15-3    | According to guidelines, the determination of CA15-3 is part of the work-up in metastasized <b>breast cancer</b> and should neither be used in diagnosis nor in follow-up of breast cancer patients, in so far there are no clinical abnormalities [12,14].                                                                                                                                                                                                                                                                                                                                                                                                                                                                                                                                                                      | L01, L02B                             | C50, D05 (breast cancer)                      | 85.A0-A7                                                   | 23.0110- 23.0210                                                                                                          |
| CA 19-9    | With diagnosis of a <b>pancreatic mass</b> , CA19-9 should be determined [8,31]. while there is no recommendation for screening [32] or a standardized follow-up (including TM) after curatively resected pancreatic cancer. Additionally, it can be determined for the diagnosis and follow-up for <b>biliary tract carcinoma</b> , as well as in screening for biliary cancer in patients with primary sclerosing cholangitis [54].                                                                                                                                                                                                                                                                                                                                                                                            | L01                                   | C25 (pancreas), C22.1,7,9, C23, C24 (biliary) | 52.5 to 52.63; 51.2, 51.3, 51.99, 50.20-29, 50.2A2-50.2C16 | 20.2710 - 20.2750, 20.2610-20.2700; 20.2470-20.2530                                                                       |
| CA 72-4    | At least since the year 2012 there is no guideline based recommendation for the use of this (or other, e.g. CEA, CA19-9) markers in <b>gastric cancer</b> [9,21]. A routine determination of TM should, according to guidelines, not be performed either in primary diagnosis nor in follow-up. It is used in medical praxis for gastric cancer progress control.                                                                                                                                                                                                                                                                                                                                                                                                                                                                | L01                                   | C16 (gastric cancer)                          | 43.42.0, 43.5, 43.6, 43.7, 43.8, 43.9                      | 20.1050, 20.1100, 20.1110, 20.1120, 20.1130, 20.1140                                                                      |

|        |                                                                                                                                                                                                                                                                                                                                                                                                                                                                                                                                                                                                                                                                 |     |            |                           |
|--------|-----------------------------------------------------------------------------------------------------------------------------------------------------------------------------------------------------------------------------------------------------------------------------------------------------------------------------------------------------------------------------------------------------------------------------------------------------------------------------------------------------------------------------------------------------------------------------------------------------------------------------------------------------------------|-----|------------|---------------------------|
| CA 125 | CA125 should not be used as a screening parameter, even not in high risk patients of ovarian cancer: In a retrospective study of 241 women with a pathogenic BRCA1 or BRCA2 mutation the positive predictive value of a determination of CA125 was only six % [33]. In patients with ovarian cancer there should not be a routine follow-up with determination of markers insofar the patient is clinically symptom free [7,34]. This is different in patients with germ cell tumor: here it is recommended to determine the marker every month in the first six months after diagnosis. CA125 should be determined under maintenance therapy in both entities. |     |            |                           |
|        | L01                                                                                                                                                                                                                                                                                                                                                                                                                                                                                                                                                                                                                                                             | C56 | 65.3, 65.4 | 22.1570, 22.1580, 22.1590 |

<sup>a</sup> Anatomical therapeutic chemical classification [55] <sup>b</sup> International Statistical Classification of Diseases and Related Health Problems [56] <sup>c</sup> Swiss operation classification.[57] <sup>d</sup> “Tarif médical” (TARMED), the Swiss single service tariff for medical services [58].

**Table S2.** Number of tumor marker (TM) determination in one patient at index date.

| Characteristic                         | 1 TM, N = 25,728 <sup>a</sup> | 2 different TM, N = 7838 <sup>a</sup> | 3 or more different TM, N = 2971 <sup>a</sup> |
|----------------------------------------|-------------------------------|---------------------------------------|-----------------------------------------------|
| <b>Gender</b>                          |                               |                                       |                                               |
| Women                                  | 17,075 (66.4%)                | 5492 (70.1%)                          | 2603 (87.6%)                                  |
| Men                                    | 8653 (33.6%)                  | 2346 (29.9%)                          | 368 (12.4%)                                   |
| <b>Age</b>                             | 66 (54, 76)                   | 68 (56, 76)                           | 65 (54, 75)                                   |
| <b>Appropriate request<sup>b</sup></b> | 10,038 (39.0%)                | 3985 (50.8%)                          | 1150 (38.79%)                                 |

<sup>a</sup> Number (percent); Median (IQR). <sup>b</sup> Percent of “Appropriate request” is given in relation to the respective number of TM determined.

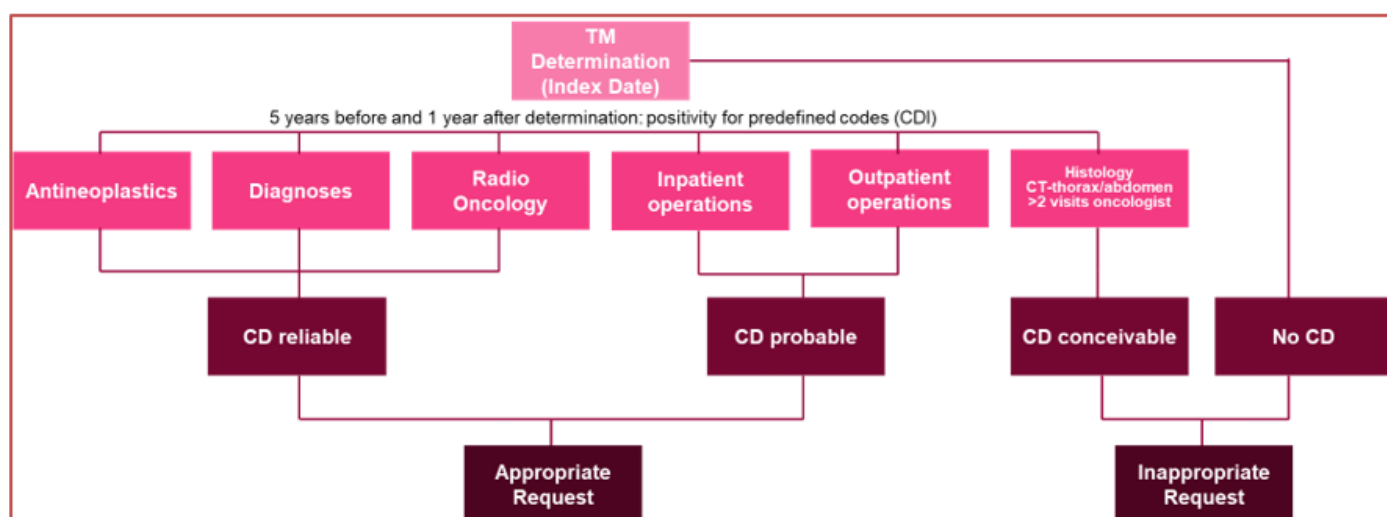

**Figure S1.** Flow Chart: Tumor marker (TM) determination, cancer related diseases and interventions (CDI), and classification towards appropriateness according to the probability of cancer diagnosis (CD).
